# Supplementary material for: Atomic layer deposited tantalum oxide to anchor Pt/C for a highly stable catalyst in PEMFCs
Source: Royal Society of Chemistry journal article supplement (doi:10.1039/c7ta01926b), 2017-01-01
Supplement: c7ta01926b1.pdf [file c7ta01926b1.pdf]

*Supporting Information for*

## **Atomic Layer Deposited Tantalum Oxide to Anchor Pt/C for Highly Stable Catalyst in PEMFCs**

Zhongxin Song,<sup>a</sup> Biqiong Wang,<sup>a</sup> Niancai Cheng,<sup>a</sup> Lijun Yang,<sup>b</sup> Dustin Banham,<sup>b</sup> Ruying Li,<sup>a</sup> Siyu Ye,<sup>b,\*</sup> Xueliang Sun<sup>a,\*</sup>

<sup>a</sup> Department of Mechanical and Materials Engineering, University of Western Ontario, London, ON, Canada N6A 5B9. Email: xsun@eng.uwo.ca

<sup>b</sup> Ballard Power Systems Inc., Burnaby, British Columbia, V5J 5J8, Canada. Email: siyu.ye@Ballard.com

\* Corresponding author.

X. Sun Email: xsun@eng.uwo.ca; S.Ye Email: siyu.ye@ballard.com.

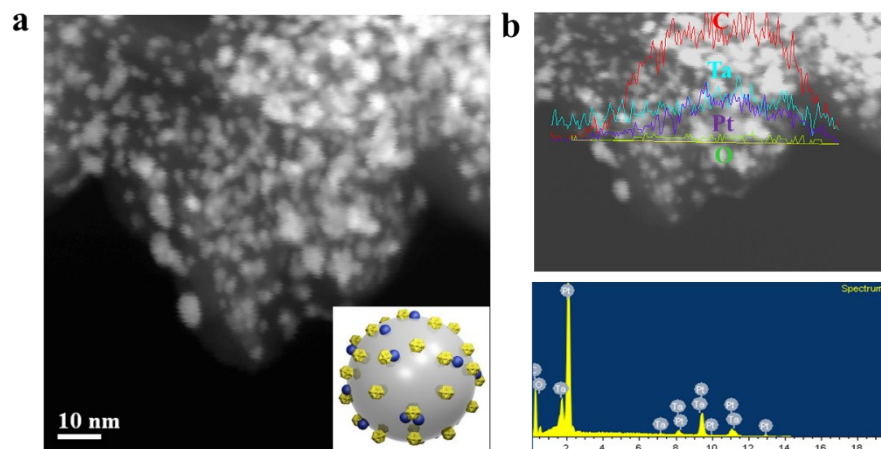

Figure S1. (a) STEM image and (b) STEM line scan spectra of 15ALD-TaO<sub>x</sub>-Pt/C catalyst.

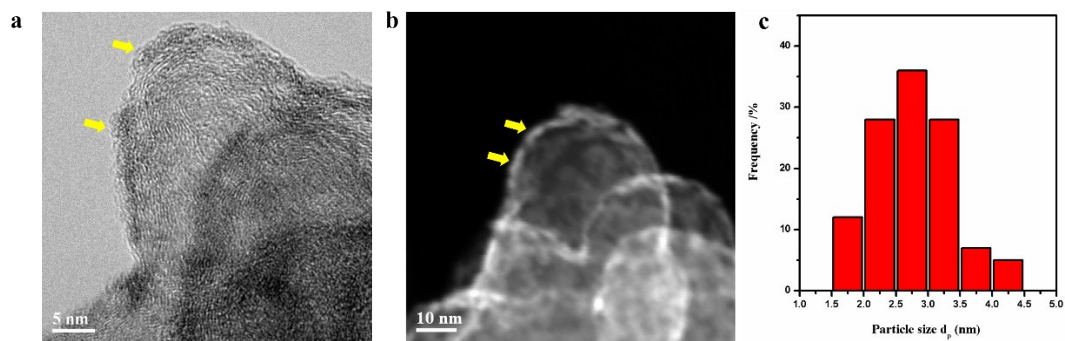

Figure S2. (a) HRTEM and (b) STEM images of 35ALD-TaOx on CB without Pt NPs. (c) The particle size distribution histogram of TaOx in 35 ALD-TaOx-CB sample.

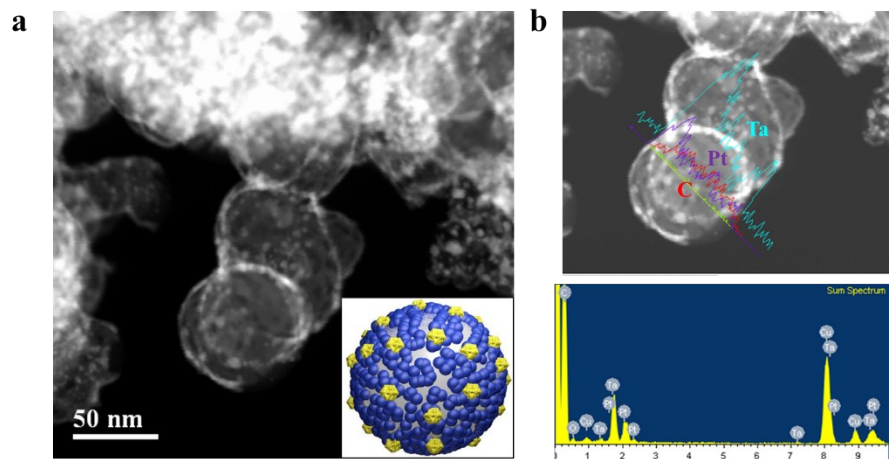

Figure S3. (a) STEM image and (b) STEM line scan spectra of 50ALD-TaOx-Pt/C catalyst.

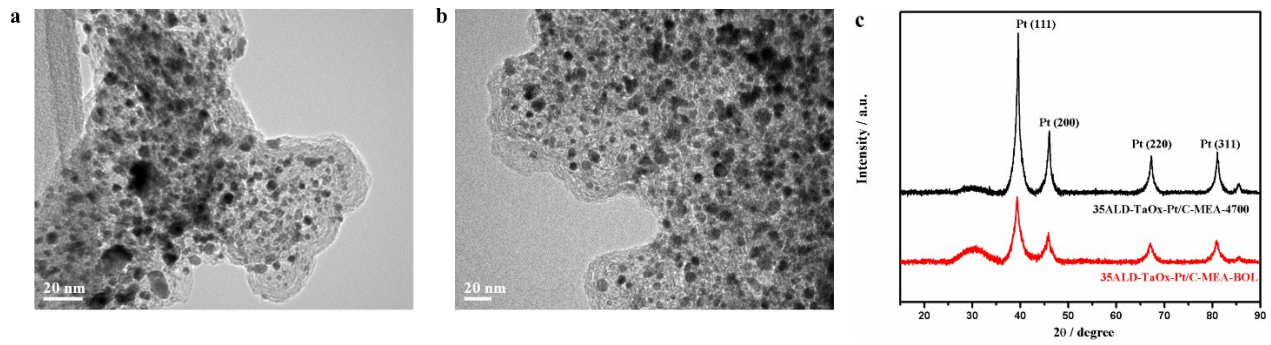

Figure S4. HRTEM images (a, b) and XRD patterns (c) of 35ALD-TaOx-Pt/C-MEA cathode before (a) and after (b) 4700 cycles aging test.

Table S1. The ECSA values and Mass activity of different catalyst during the ADT cycling between 0.6 V-1.0 V.

| Catalyst        | ECSA ( $\text{m}^2 \cdot \text{g}^{-1} \text{Pt}$ ) |          |            | Mass activity ( $\text{A} \cdot \text{mg}^{-1} \text{Pt}$ )<br>@0.9 V |           |
|-----------------|-----------------------------------------------------|----------|------------|-----------------------------------------------------------------------|-----------|
|                 | BOL                                                 | ADT-1000 | ADT-10,000 | BOL                                                                   | ADT-10000 |
| 15ALD-TaOx-Pt/C | 60.0                                                | 58.8     | 52.8       | 0.237                                                                 | 0.200     |
| 35ALD-TaOx-Pt/C | 60.6                                                | 64.7     | 62.7       | 0.246                                                                 | 0.227     |
| 50ALD-TaOx-Pt/C | 12.9                                                | 39.8     | 48.3       | 0.148                                                                 | 0.173     |
| Pt/C            | 68.8                                                | 60.8     | 48.4       | 0.262                                                                 | 0.197     |

Table S2. The ECSA values and Mass activity of different catalyst during the ADT cycling between 1.0 V-1.6 V.

| Catalyst        | ECSA ( $\text{m}^2 \cdot \text{g}^{-1} \text{Pt}$ ) |          |          | Mass activity ( $\text{A} \cdot \text{mg}^{-1} \text{Pt}$ )<br>@0.9 V |          |
|-----------------|-----------------------------------------------------|----------|----------|-----------------------------------------------------------------------|----------|
|                 | BOL                                                 | ADT-1000 | ADT-6000 | BOL                                                                   | ADT-6000 |
| 15ALD-TaOx-Pt/C | 61.0                                                | 68.3     | 43.6     | 0.237                                                                 | 0.146    |
| 35ALD-TaOx-Pt/C | 59.8                                                | 74.5     | 49.5     | 0.246                                                                 | 0.180    |
| 50ALD-TaOx-Pt/C | 15.7                                                | 30.8     | 13.4     | 0.148                                                                 | 0.070    |
| Pt/C            | 66.4                                                | 54.5     | 34.1     | 0.262                                                                 | 0.145    |
